# Supplementary material
Source: PubMed Central journal article supplement (PMC2730371)

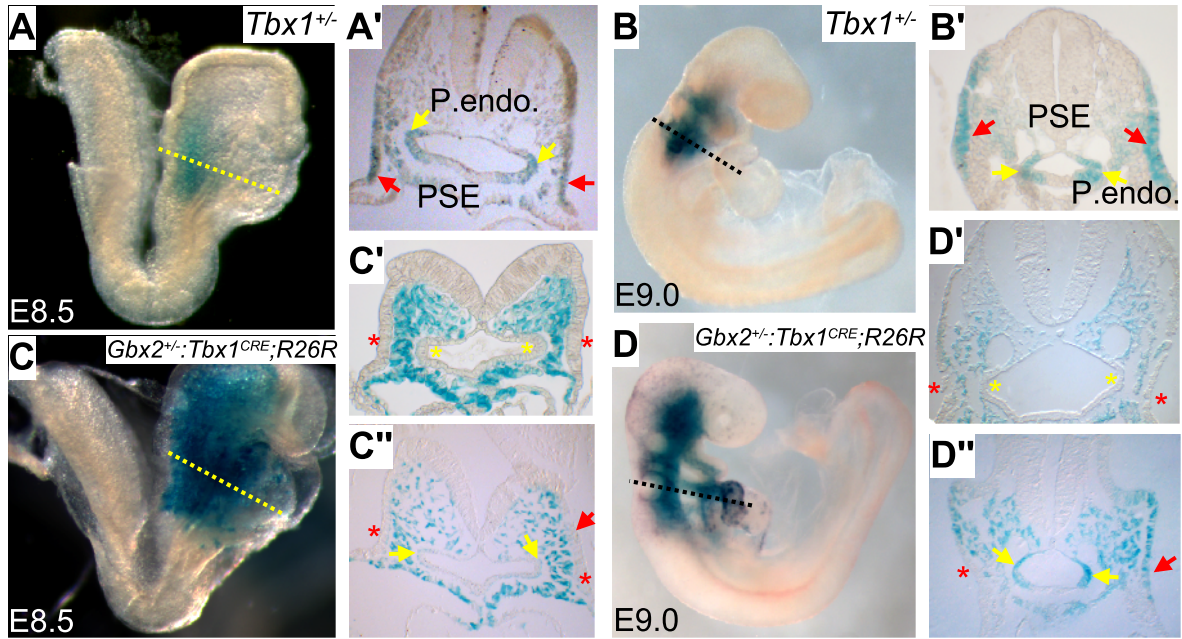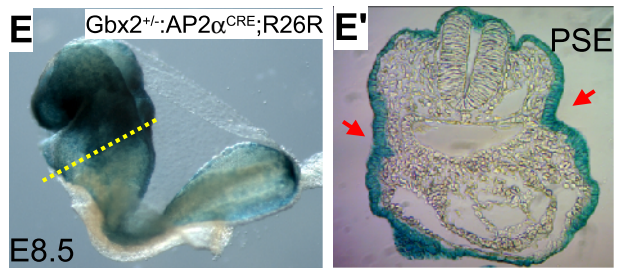

Supplement: supp_136_18_3173__1.pdf [file supp_136_18_3173__1.pdf]

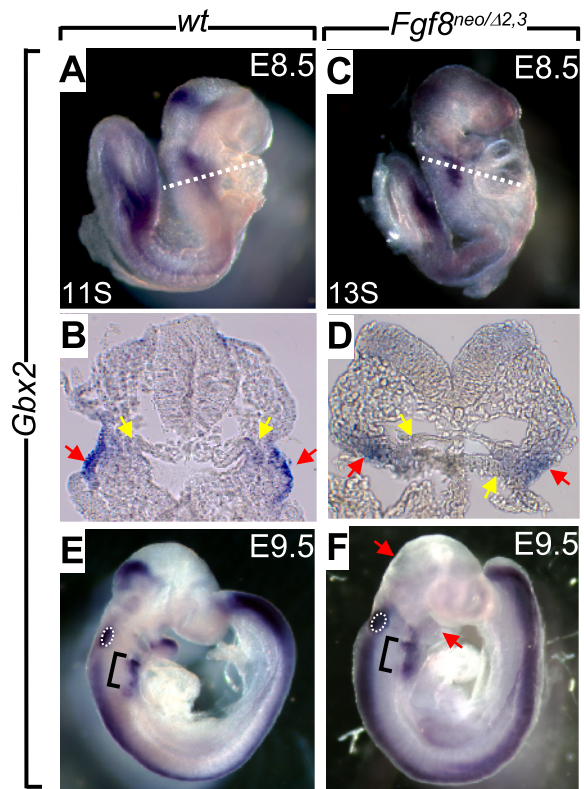

Supplement: supp_136_18_3173__2.pdf [file supp_136_18_3173__2.pdf]
